# Supplementary material for: Exploring the Sensory Properties and Preferences of Fruit Wines Based on an Online Survey and Partial Projective Mapping
Source: MDPI journal article supplement (doi:10.3390/foods12091844), 2023-04-29

**Supplementary Table S1** The types of fruit wines and their alcoholic content

|                     | Blueberry wines |       |     |      | Apricot wine | Hawthorn wines |       |            | Rose roxburgh wine | Goji berry wine |
|---------------------|-----------------|-------|-----|------|--------------|----------------|-------|------------|--------------------|-----------------|
| Samples             | B1              | B2    | B3  | B4   | A            | H1             | H2    | H3         | R                  | G               |
| Alcohol Content (%) | 12              | 12    | 12  | 10.5 | 17-19        | 15             | 8     | 12         | 12                 | 7               |
| Type                | Dry             | Sweet | Dry | Dry  | Sweet        | Dry            | Sweet | Semi-sweet | Sweet              | Semi-dry        |

**Supplementary Table S2** Influence of gender on liking, familiarity, and usage ratings for 6 wines

|                     |   | Gender       |                   |                             |
|---------------------|---|--------------|-------------------|-----------------------------|
|                     |   | Liking (1-5) | Familiarity (1-5) | Consumption Frequency (1-5) |
| Grape wine          | 1 | 3.837±0.981a | 3.535±1.014       | 2.395±0.786a                |
|                     | 2 | 3.520±0.795b | 3.554±1.005       | 2.122±0.582b                |
| Blueberry wine      | 1 | 3.558±0.889  | 2.581±1.057       | 1.558±0.606                 |
|                     | 2 | 3.649±0.790  | 2.784±0.959       | 1.622±0.599                 |
| Hawthorn wine       | 1 | 3.244±1.005  | 2.384±0.923b      | 1.337±0.467b                |
|                     | 2 | 3.142±0.940  | 2.670±1.109a      | 1.520±0.633a                |
| Goji berry wine     | 1 | 3.047±1.062  | 2.372±1.041       | 1.384±0.617                 |
|                     | 2 | 2.878±0.880  | 2.622±1.072       | 1.405±0.581                 |
| Rosa roxburghi wine | 1 | 3.023±0.945  | 1.965±0.744       | 1.221±0.417                 |
|                     | 2 | 3.020±0.782  | 2.034±0.844       | 1.203±0.801                 |
| Apricot wine        | 1 | 3.140±0.922  | 2.035±0.846       | 1.267±0.445                 |
|                     | 2 | 3.142±0.800  | 2.108±0.842       | 1.277±0.590                 |

Gender 1 is females ( $n=148$ ) and 2 is males ( $n=86$ ). Letters a-b show significant differences between subgroups within sample (ANOVA with Tukey's for genders; p

< 0.05).

**Supplementary Figure S1.** Questionnaire data analysis( $n=234$ ). Frequency distribution of the acceptable alcohol content(A), considerations when purchasing alcohol products(B), analysis of general health interest (C), analysis of food neophobia scale (D), analysis of attitudes for alcoholic drinks (E) and analysis of attitudes for sweetness (F).

A

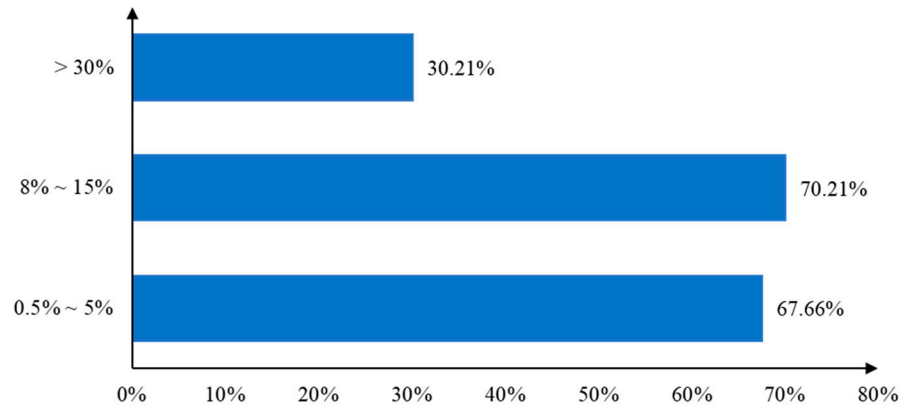

B

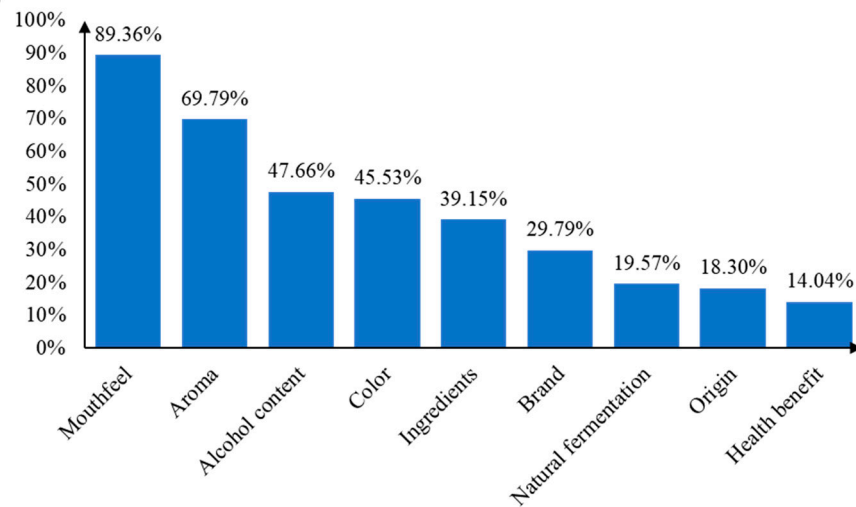

C

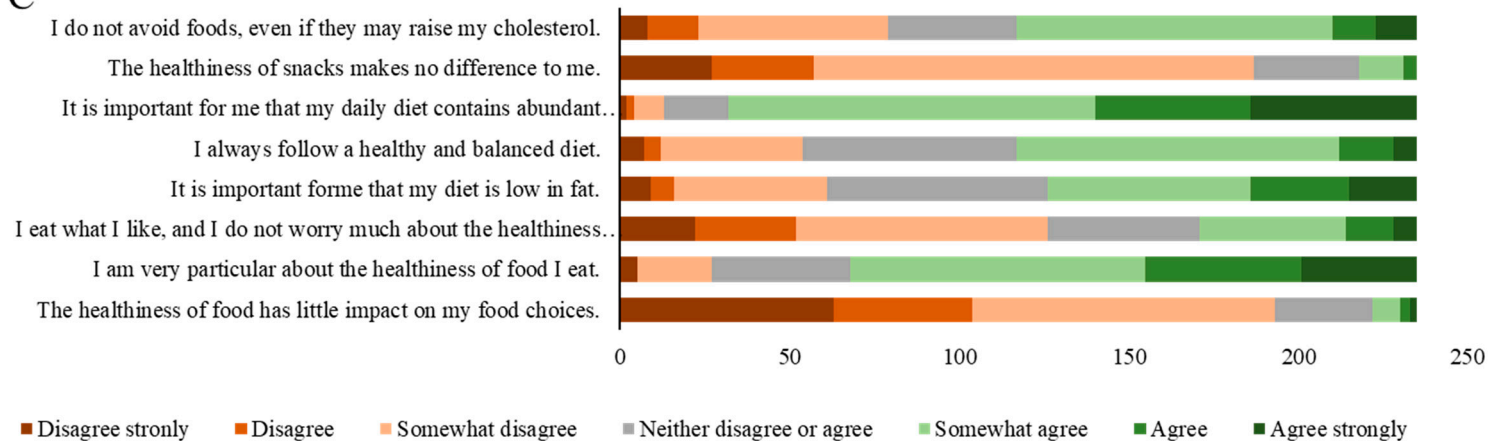

D

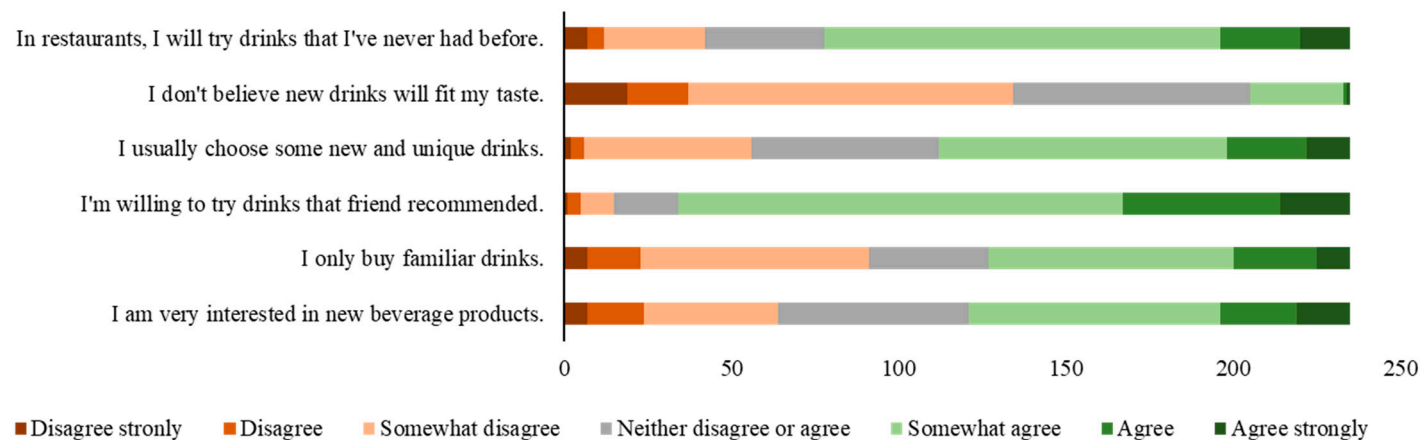

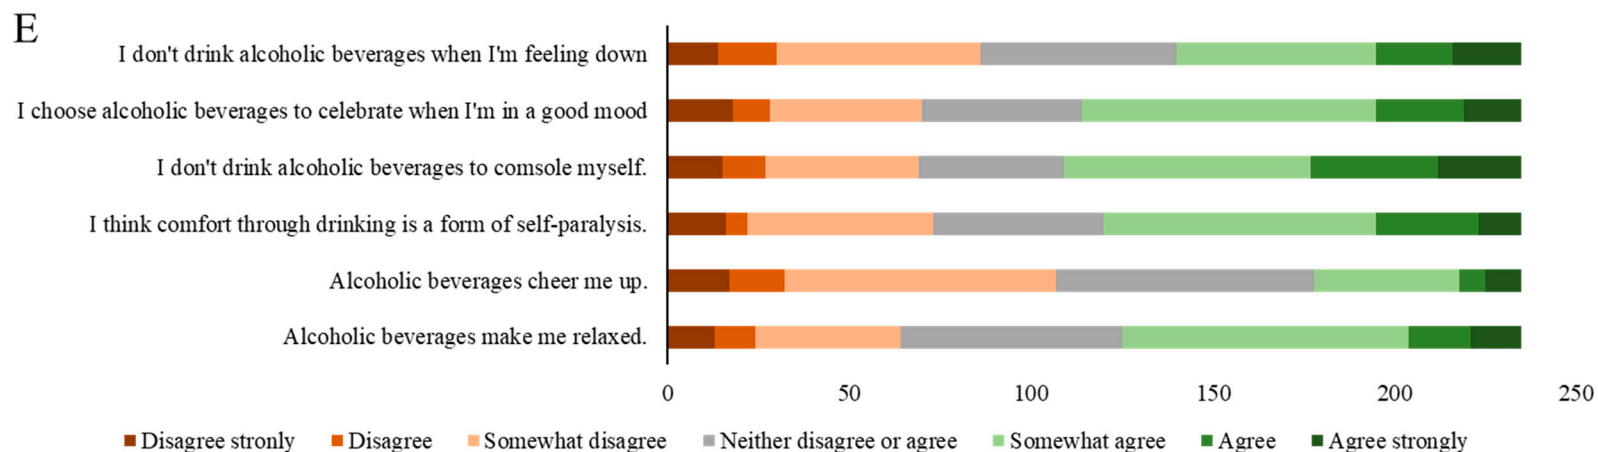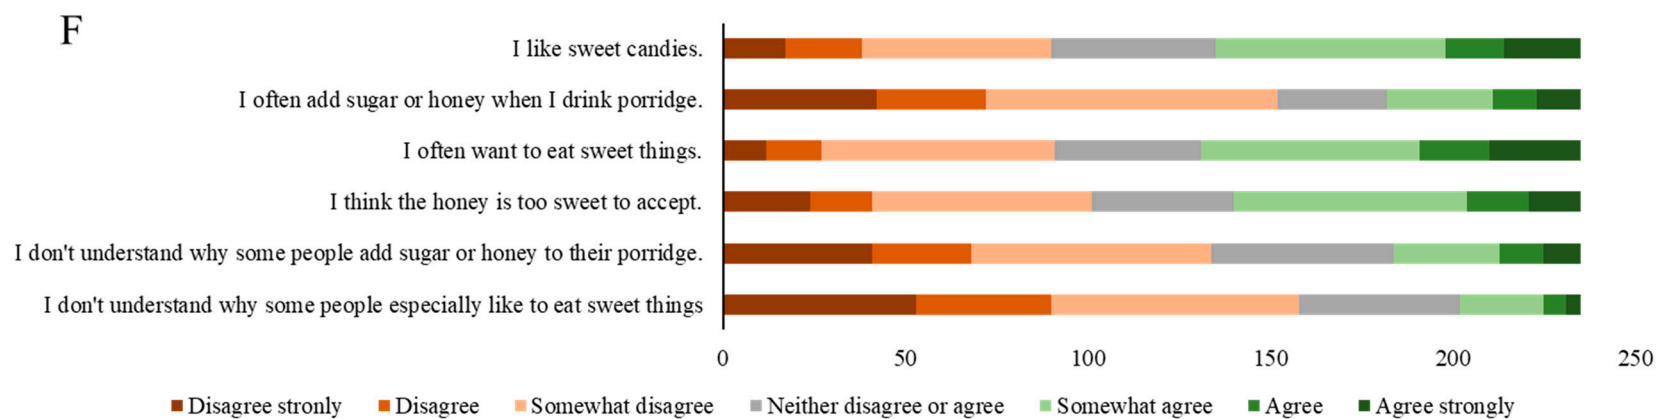

**Supplementary Figure S2.** Projective Mapping task word cloud with (A) appearance, (B) aroma and (C) taste.

A

B1

B2

B3

B4

A

Fuchsia (purple-red)

Deep purple red  
Rose red  
Transparent  
Crimson (deep red)  
Purple  
Wine red  
Light red  
Pale pink  
Clear  
Medium  
Turbid  
Opaque  
Deep purple

Transparent  
Rose red  
Deep  
Light  
Opaque  
Wine red  
Clear  
Deep purple red  
Turbid  
Purple  
Medium

Fuchsia (purple-red)

Crimson (deep red)

Fuchsia (purple-red)  
Light  
Blood red  
Black red  
Wine red  
Deep  
Medium  
Clear  
Turbid  
Transparent  
Red  
Brick red  
Opaque  
Reddish brown

Reddish brown  
Opaque  
Fuchsia (purple-red)  
Black red  
Blood red  
Wine red  
Light red  
Brick red  
Medium  
Clear  
Turbid  
Deep  
Crimson (deep red)  
Transparent

Reddish brown  
Orange red  
Deep  
Red  
Orange red  
Clear  
Translucent  
Brown  
Opaque  
Orange yellow  
Even  
Light

H1

H2

H3

G

R

Orange yellow  
Opaque  
Translucent  
Light brown  
Yellow  
Light  
Turbid  
Clear  
Orange red  
Orange red  
Brownish yellow

Reddish brown  
Light brown  
Brownish yellow  
Crimson (deep red)  
Light  
Deep reddish brown  
Deep  
Turbid  
Clear  
Orange red  
Brown  
Medium  
Orange red  
Deep brown  
Opaque  
Transparent

Transparent  
Light orange  
Amber  
Opaque  
Light yellow  
Golden yellow  
Even  
Deep amber  
Yellow  
Clear  
Bright  
Orange red  
Translucent  
Orange yellow  
Light

Light  
Yellow  
Bright yellow  
Golden yellow  
Translucent  
Clear  
Bright  
Even  
Light yellow  
Transparent

Yellow  
Brownish yellow  
Light  
Orange red  
Golden yellow  
Clear  
Deep  
Translucent  
Orange yellow  
Opaque  
Medium  
Transparent

B

B1

Pungent  
unbalanced fragrance  
Blueberry  
Hawthorn  
Sweet  
Sour  
Flower  
Fresh fragrance  
Light alcohol  
Caramel  
Fragrant  
Gooseberry  
Lightly sour  
Fruity  
Grape  
Wine  
Strongy fragrant

H1

Lightly fragrant  
Deep alcohol  
Sour  
Fruity  
Chemical  
Baijiu  
Light alcohol  
Honey  
Sweet  
Alcohol  
Herbal  
Pungent  
Strongy fragrant

B2

Blueberry  
Grape  
Paint  
Deep alcohol  
Sour  
Fruity  
Berry  
Light fruit  
Flower  
Wine  
Rich fruit  
Hawthorn  
Alcohol  
Pungent  
Not pungent  
Strongy fragrant

H2

Lightly fragrant  
Sweet  
Sour  
Fruity  
Light alcohol  
Strongy fragrant  
Balanced fragrance  
Hawthorn

B3

Lightly fragrant  
Chemical  
Pungent  
Deep alcohol  
Goji berry  
Fruity  
Wine  
Light alcohol  
Alcohol  
Grape  
Sour  
Berry  
Paint  
Gasoline  
Not pungent  
Herbal  
Strongy fragrant

H3

Lightly fragrant  
Sour  
Deep alcohol  
Alcohol  
Fruity  
Sweet  
Fragrant  
Beer  
Goji berry  
Not pungent  
Apricot  
Hawthorn

B4

Lightly fragrant  
Stinking  
Pungent  
Deep alcohol  
Spoilage  
Woody  
Light alcohol  
Mushroom  
Caramel  
Grape  
Goji berry  
Fruity  
Gooseberry  
Alcohol  
unbalanced fragrance  
Strongy fragrant

G

Lightly fragrant  
Strongy fragrant  
Deep alcohol  
Beer  
Alcohol  
Apricot  
Flower  
Apple  
Grain  
Light alcohol  
Fresh fragrance  
Fruity  
Pungent  
Sweet  
Balanced fragrance

A

Pungent  
Deep alcohol  
Herbal  
Alcohol  
Chemical  
Caramel  
Paint  
Flower  
Sour  
Fruity  
Sweet  
Fragrant  
Hawthorn  
unbalanced fragrance  
Strongy fragrant

R

Pungent  
Deep alcohol  
Sour  
Fruity  
Herbal  
Stinking  
Soil  
Woody  
Light alcohol  
Grass  
Spoilage  
unbalanced fragrance  
Strongy fragrant

C

**B1**

**B2**

**B3**

**B4**

**A**

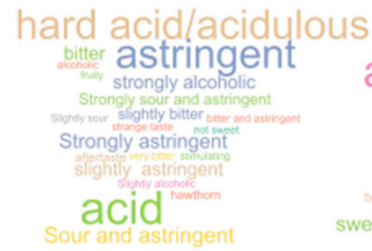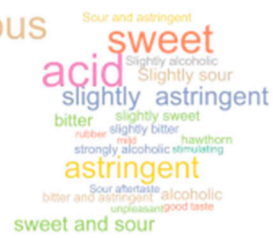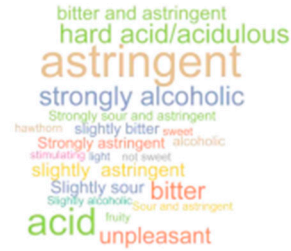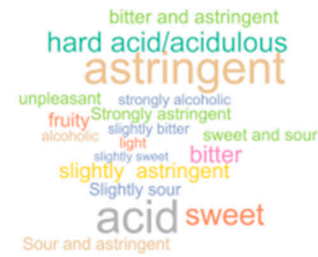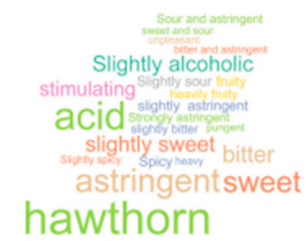

# H1

## H2

### H3

**G**

**R**

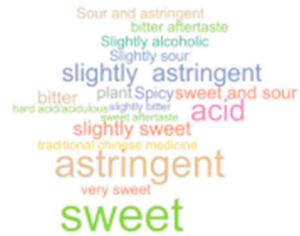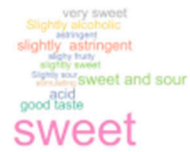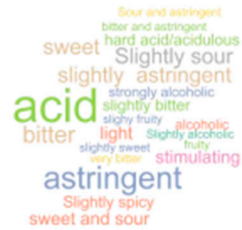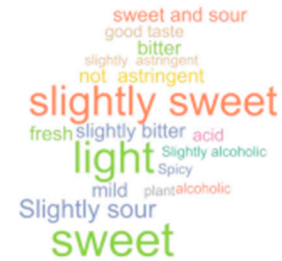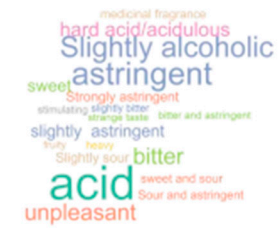

Supplementary Figure S3. Liking: no consumer segmentation-2 clusters.

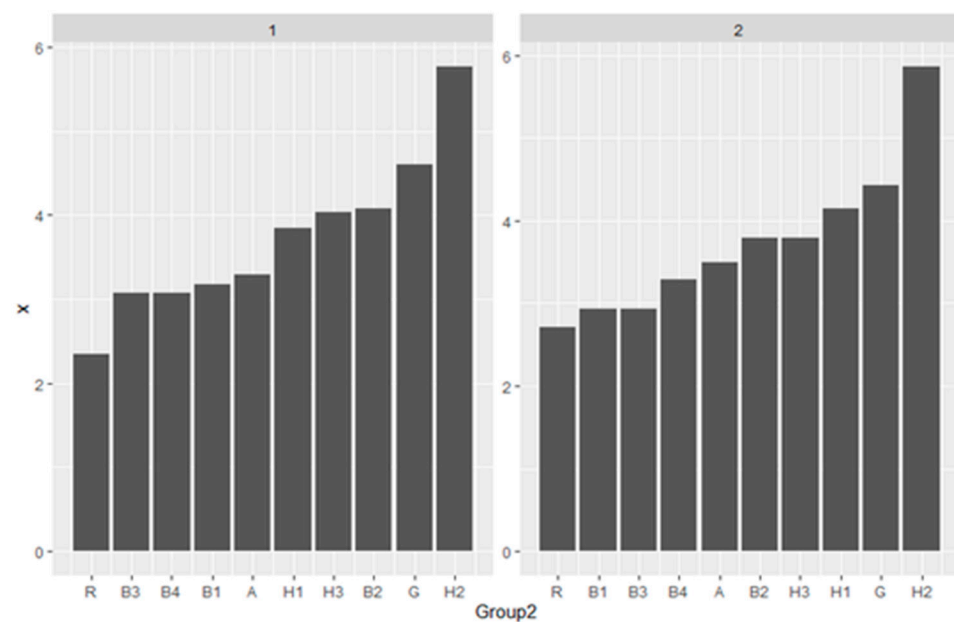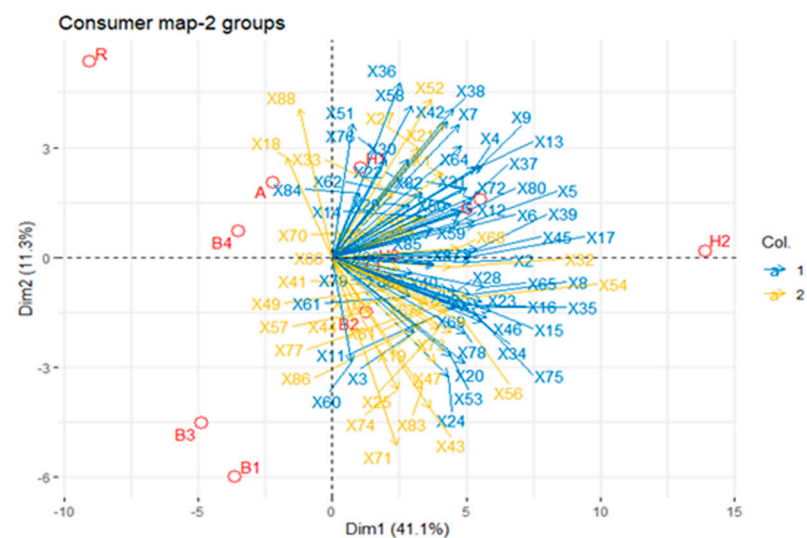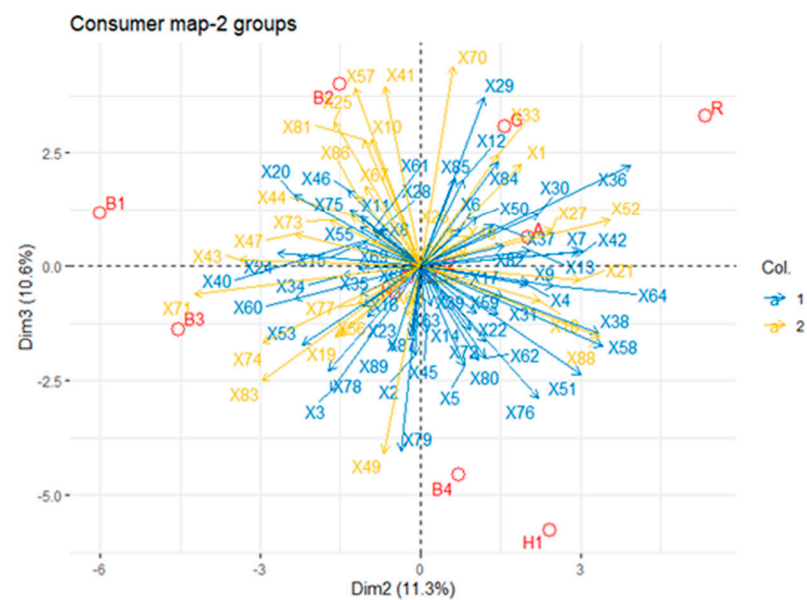

Supplement: s1 [file s1]
